# Supplementary material for: Polymyxin B in Combination with Glycerol Monolaurate Exerts Synergistic Killing against Gram-Negative Pathogens
Source: MDPI journal article supplement (doi:10.3390/pathogens11080874), 2022-08-02
Supplement: s1 [file s1]

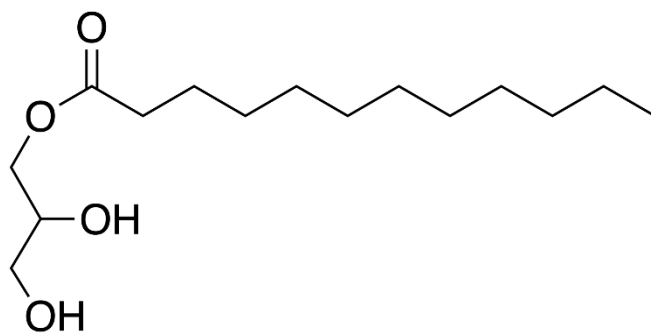

Glycerol monolaurate

**Figure S1.** The structure of glycerol monolaurate.

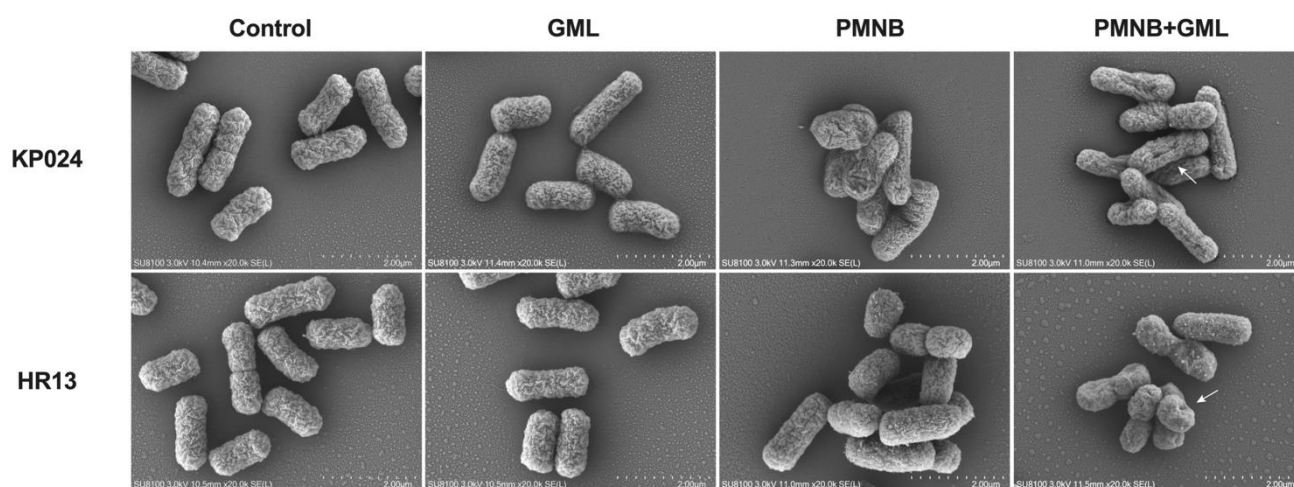

**Figure S2.** Cellular morphology of *K. pneumoniae* KP024 and *A. baumannii* HR13. SEM images of KP024 and HR13 after treatment with 4× MIC PMNB alone, GML (500 µg/mL) alone or in combination.

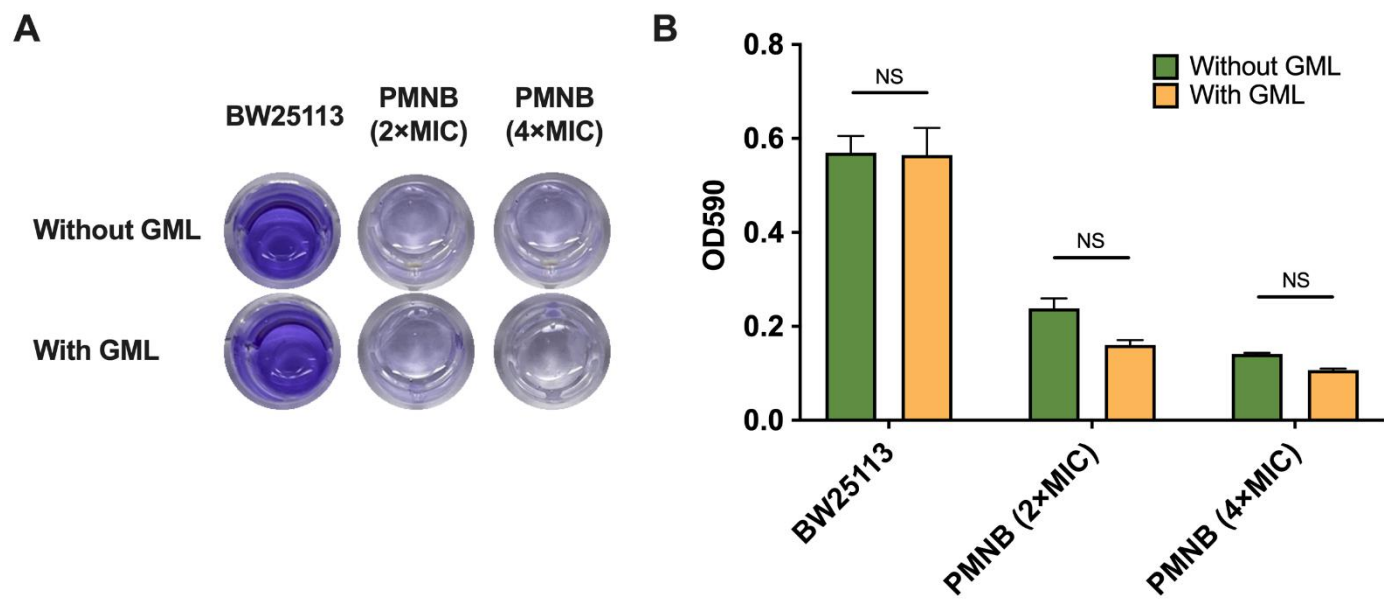

**Figure S3.** Impact of PMNB and GML on biofilm formation. **(A)** Crystal violet staining of *E. coli* BW25113 with different treatments. **(B)** Biomass quantification of biofilms by measurement of absorbance at 590 nm. PMNB, polymyxin B; GML, glycerol monolaurate.

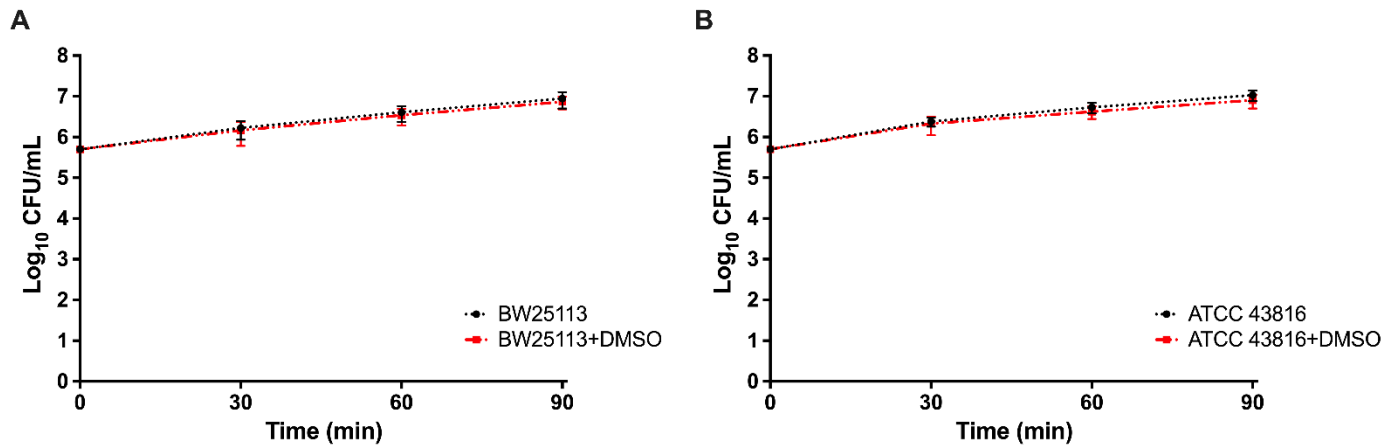

**Figure S4.** The effect of DMSO on (A) *E. coli* BW25113 and (B) *K. pneumoniae* ATCC 43816 growth kinetics. The addition of DMSO (5 %) alone did not alter bacterial growth *in vitro*. Results are representative of three independent experiments; error bars represent the standard errors of the means. P values (compared to untreated) are > 0.05.
